# Supplementary material for: Apoptotic cell clearance of Leishmania major-infected neutrophils by dendritic cells inhibits CD8+ T-cell priming in vitro by Mer tyrosine kinase-dependent signaling
Source: PubMed Central journal article supplement (PMC4720886; doi:10.1038/cddis.2015.351), 2015-12-10
Supplement: cddis2015351x1.pdf [file cddis2015351x1.pdf]

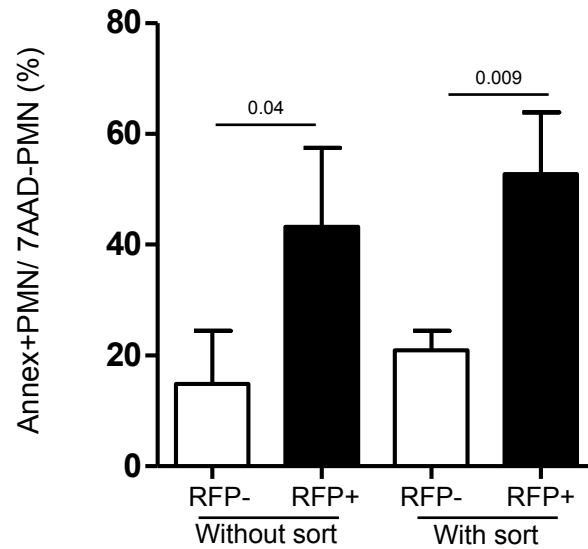

**Figure S1.** Frequencies of annexinV<sup>+</sup> 7-AAD<sup>-</sup> uninfected eGFP<sup>hi</sup>RFP<sup>-</sup> or infected eGFP<sup>hi</sup>RFP<sup>+</sup> neutrophils recovered from the ear dermis at 12 hrs after infection with  $2 \times 10^6$  *Lm*-RFP metacyclic promastigotes purified or not by cell sorting. Mean percentage  $\pm$  1 s.d., data are pooled from three independent experiments.

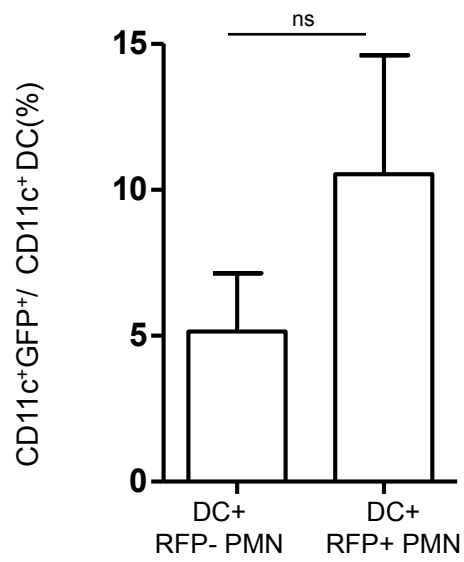

**Figure S2.** Frequencies of CD11c<sup>+</sup>GFP<sup>+</sup> DCs from culture with uninfected eGFP<sup>hi</sup>RFP<sup>-</sup> or infected eGFP<sup>hi</sup>RFP<sup>+</sup> neutrophils for 16 hrs (mean percentage +/- 1 s.d.) calculated from 3 independent experiments.

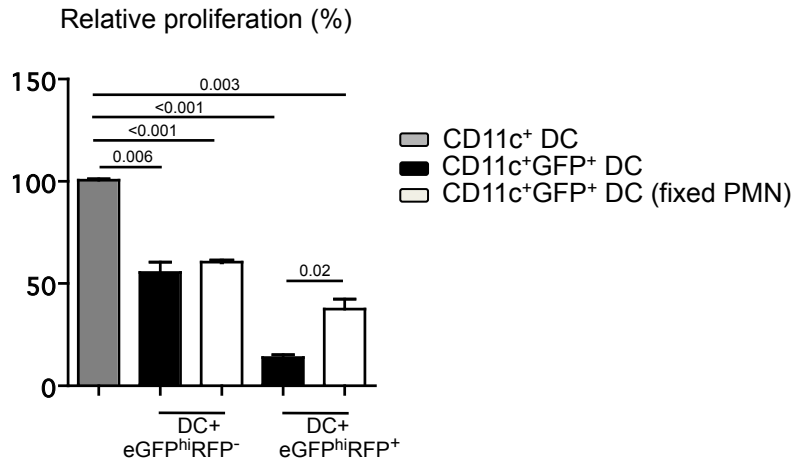

**Figure S3.** Relative proliferation of CFDA-labeled OT-I CD8<sup>+</sup> T cultured for three days with sorted CD11c<sup>+</sup> (no exposure to neutrophils), CD11c<sup>+</sup>GFP<sup>-</sup> and CD11c<sup>+</sup>GFP<sup>+</sup> cells (following overnight culture with fixed or unfixed uninfected or infected neutrophils), in presence of soluble OVA. Mean percentage +/- 1 s.d. calculated from 2 independent experiments.

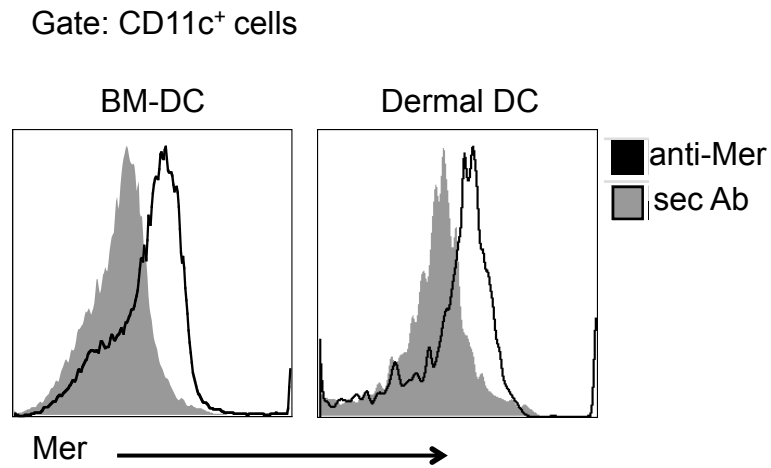

**Figure S4.** Mer expression on bone marrow derived-DCs and dermal DCs. Representative histogram plot of Mer expression on CD11c<sup>+</sup> gated cells, anti-Mer (black line) and isotype control (gray filled) stained cells.

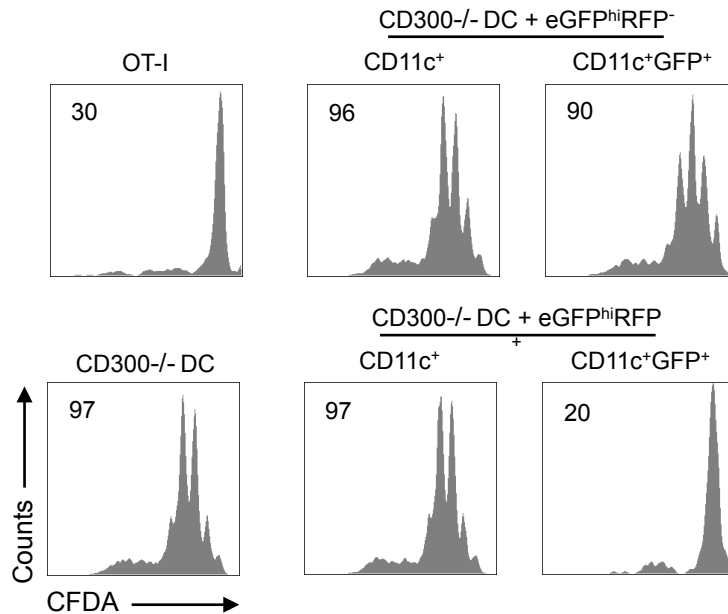

**Figure S5.** Antigen presentation function of CD300f-deficient DCs that have captured *L. major*-infected and uninfected neutrophils. CD300f<sup>-/-</sup> DCs were cultured or not with eGFP<sup>hi</sup>RFP<sup>-</sup> and eGFP<sup>hi</sup>RFP<sup>+</sup> dermal neutrophils for 12-16 hrs. Sorted CD11c<sup>+</sup>, CD11c<sup>+</sup>GFP<sup>-</sup> and CD11c<sup>+</sup>GFP<sup>+</sup> cells were cultured with CFDA-labeled OT-I CD8<sup>+</sup> T cells for three days, in presence of OVA antigen. Representative histogram plots of CFDA fluorescence of CD8<sup>+</sup>CD3<sup>+</sup> gated cells showing the proliferative response. Numbers represent the frequency of cells with reduced CFDA content.

Supplementary figure 6

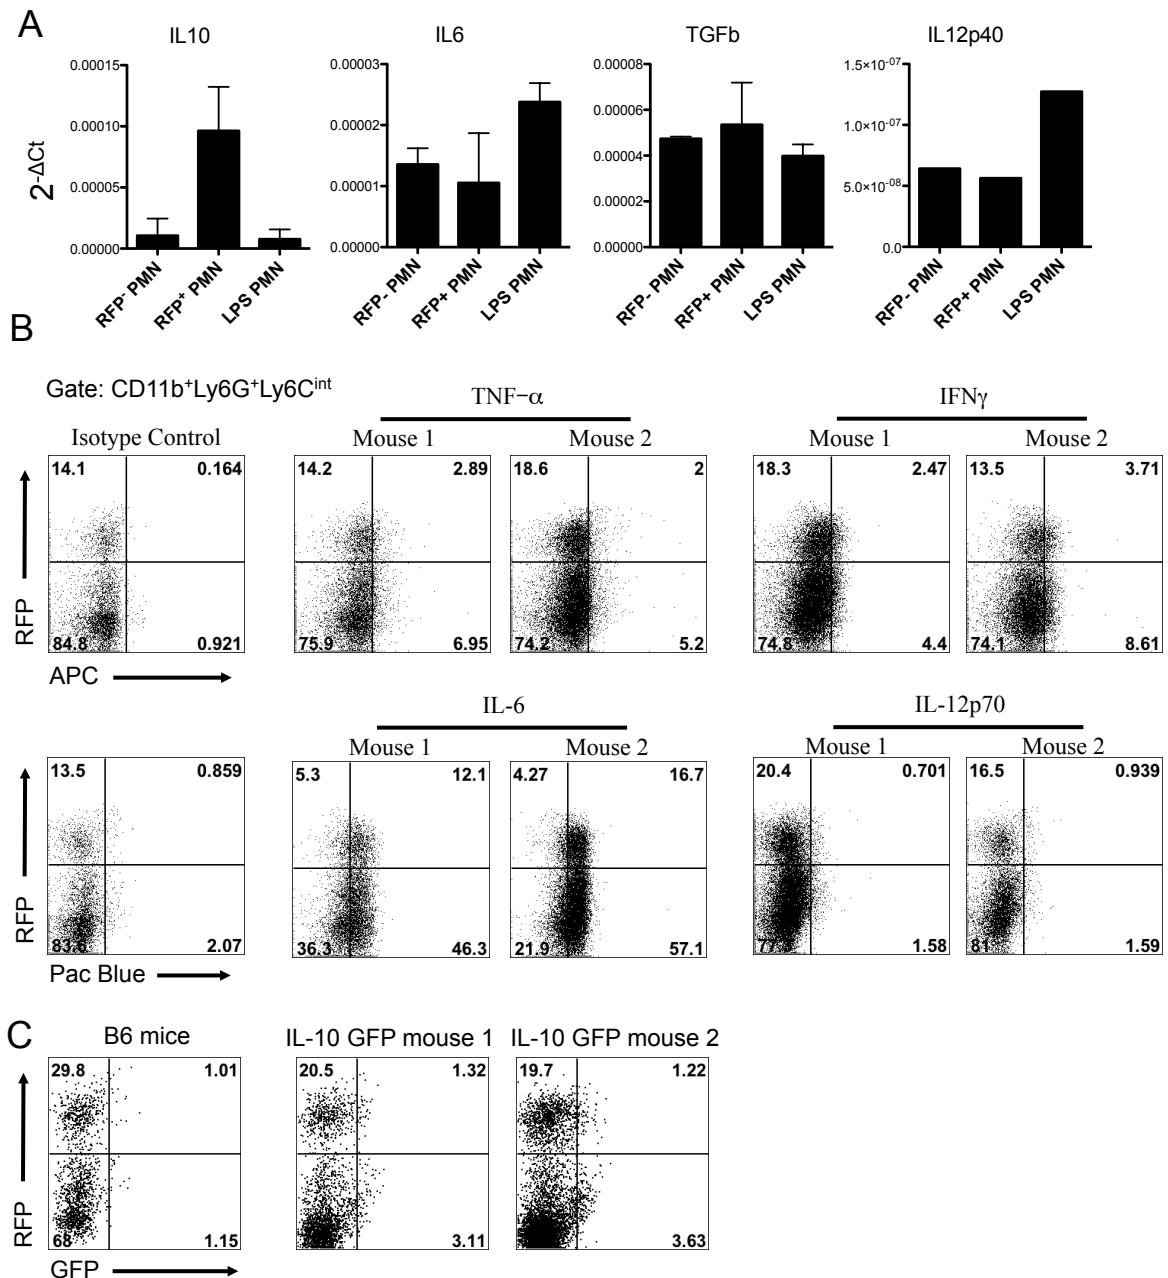

**Figure S6.** Cytokine expression in *L. major*-infected and uninfected neutrophils. (A) eGFP<sup>hi</sup> neutrophils recovered from the ear dermis 12 hrs after infection with 2 × 10<sup>6</sup> *Lm*-RFP metacyclic promastigotes or injection of 10 ng of LPS were sorted to obtain uninfected eGFP<sup>hi</sup>RFP<sup>-</sup> and infected eGFP<sup>hi</sup>RFP<sup>+</sup> neutrophils, and in situ LPS stimulated neutrophils. Dermal neutrophils were immediately processed for isolation of RNA and cytokine gene expression was measured by real-time PCR. (B) CD11b<sup>+</sup>Ly6G<sup>+</sup>Ly6C<sup>int</sup> dermal neutrophils recovered 12hrs after infection with 2 × 10<sup>6</sup> *Lm*-RFP metacyclic promastigotes were analyzed for the expression of RFP and intracellular cytokines. (C) CD11b<sup>+</sup>Ly6G<sup>+</sup>Ly6C<sup>int</sup> neutrophils recovered 12 hrs after injection of 2 × 10<sup>6</sup> *Lm*-RFP metacyclic promastigotes into the ear dermis of IL-10 GFP mice were analyzed for the expression of RFP and GFP signal.
